## Correction for: Development and validation of a RNA binding protein-associated prognostic model for lung adenocarcinoma

Wei Li<sup>1</sup>, Li-Na Gao<sup>1</sup>, Pei-Pei Song<sup>1</sup>, Chong-Ge You<sup>1</sup>

<sup>1</sup>Laboratory Medicine Center, Lanzhou University Second Hospital, Lanzhou 730030, China

Correspondence to: Chong-Ge You; email: [youchg@lzu.edu.cn](mailto:youchg@lzu.edu.cn)

Original article: *Aging (Albany NY)* 2020; 12: pp 3558 – 3573

PMID: 32087603

PMCID: PMC7066909

doi: [10.18632/aging.102828](https://doi.org/10.18632/aging.102828)

**This article has been corrected:** Due to errors in figure preparation, some of the images in Figure 10 are incorrect. Specifically, the images for row 1 (normal), panels 1 and 3; and row 3 (normal), panels 1, 2 and 3, contain the wrong images. The corrected Figure 10, produced using the original data, is shown below. The authors declare that these corrections do not change the results or conclusions of this paper.

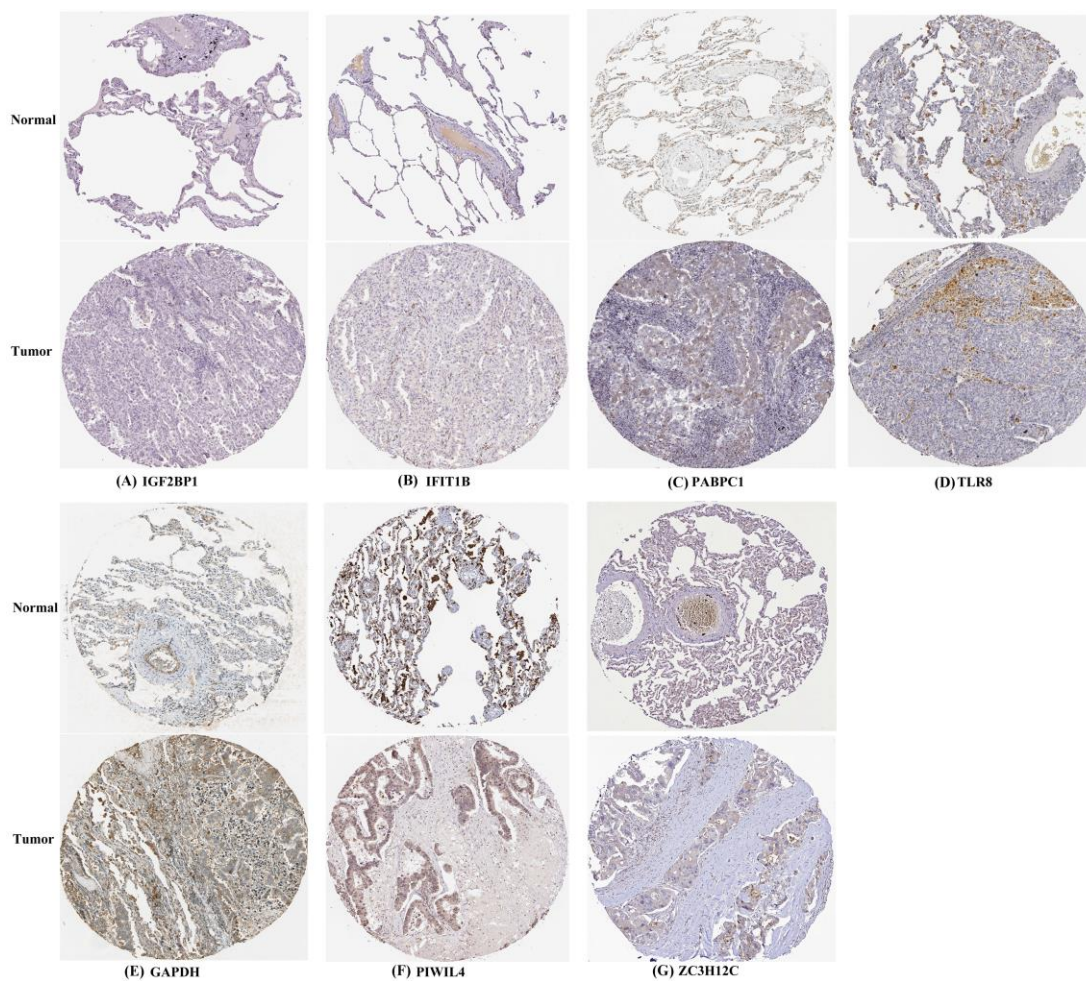

**Figure 10.** Verification of hub RBPs expression in LUAD and normal lung tissue using the HPA database. (A) IGF2BP1, (B) IFIT1B, (C) PABPC1, (D) TLR8, (E) GAPDH, (F) PIWIL4, (G) ZC3H12C.
